# Supplementary material
Source: publisher site journal article supplement (https://www.dovepress.com/article/298554)
Supplement: Supplementary file 1 [file get_supplementary_file.php]

**Additional file 1: Table S1.** Annotated gene set file used in ssGSEA .

| **Table S1. Annotated gene set file used in ssGSEA** | | | | | | | |
| --- | --- | --- | --- | --- | --- | --- | --- |
| **Terms** | **Gene markers** | | | | | | |
| APC_co_inhibition | C10orf54 | CD274 | LGALS9 | PDCD1LG2 | PVRL3 |  |  |
| APC_co_stimulation | CD40 | CD58 | CD70 | ICOSLG | SLAMF1 | TNFSF14 | TNFSF15 |
|  | TNFSF18 | TNFSF4 | TNFSF8 | TNFSF9 |  |  |  |
| CCR | CCL16 | TPO | TGFBR2 | CXCL2 | CCL14 | TGFBR3 | BMP8A |
|  | IL11RA | CCL11 | IL4I1 | IL33 | CXCL12 | CXCL10 | BMPER |
| Check-point | IDO1 | LAG3 | CTLA4 | TNFRSF9 | ICOS | CD80 | PDCD1 |
|  | PDCD1LG2 | TIGIT | CD70 | TNFSF9 | ICOSLG | KIR3DL1 | CD86 |
| Cytolytic_activity | PRF1 | GZMA |  |  |  |  |  |
| HLA | HLA-E | HLA-DPB2 | HLA-C | HLA-J | HLA-DQB1 | HLA-DQB2 | HLA-DQA2 |
|  | HLA-DQA1 | HLA-A | HLA-DMA | HLA-DOB | HLA-DRB1 | HLA-H | HLA-B |
| Inflammation-promoting | CCL5 | CD19 | CD8B | CXCL10 | CXCL13 | CXCL9 | GNLY |
|  | GZMB | IFNG | IL12A | IL12B | IRF1 | PRF1 | STAT1 |
| MHC_class_I | B2M | HLA-A | TAP1 |  |  |  |  |
| Parainflammation | CXCL10 | PLAT | CCND1 | LGMN | PLAUR | AIM2 | MMP7 |
|  | ICAM1 | MX2 | CXCL9 | ANXA1 | TLR2 | PLA2G2D | ITGA2 |
| T_cell_co-inhibition | BTLA | C10orf54 | CD160 | CD244 | CD274 | CTLA4 | HAVCR2 |
|  | LAG3 | LAIR1 | TIGIT |  |  |  |  |
| T_cell_co-stimulation | CD2 | CD226 | CD27 | CD28 | CD40LG | ICOS | SLAMF1 |
|  | TNFRSF18 | TNFRSF25 | TNFRSF4 | TNFRSF8 | TNFRSF9 | TNFSF14 |  |
| Type_I_IFN_Reponse | DDX4 | IFIT1 | IFIT2 | IFIT3 | IRF7 | ISG20 | MX1 |
|  | MX2 | RSAD2 | TNFSF10 |  |  |  |  |
| Type_II_IFN_Reponse | GPR146 | SELP | AHR |  |  |  |  |
| Activated CD8 T cell | ADRM1 | AHSA1 | C1GALT1C1 | CCT6B | CD37 | CD3D | CD3E |
|  | CD3G | CD69 | CD8A | CETN3 | CSE1L | GEMIN6 | GNLY |
| Central memory CD8 T cell | ACTN4 | ADAM12 | ADCY9 | F13A1 | FCER1G | FCGR3B | FGF7 |
|  | FKBP4 | GLUD1 | GM2A | GUSB | IL1RN | NOL11 | NTRK1 |
| Effector memeory CD8 T cell | ACAP1 | APOL3 | ARHGAP10 | ATP10D | C3AR1 | CCR5 | CD160 |
|  | CD55 | CFLAR | CMKLR1 | DAPP1 | FCRL6 | FLT3LG | GZMM |
| Activated CD4 T cell | AIM2 | BIRC3 | BRIP1 | CCL20 | CCL4 | CCL5 | CCNB1 |
|  | CCR7 | DUSP2 | ESCO2 | ETS1 | EXO1 | EXOC6 | IARS |
| Central memory CD4 T cell | ABHD3 | AHNAK | ANXA2P2 | AQP3 | ATHL1 | BMI1 | BZW2 |
|  | CD63 | COL4A1 | CYLD | ELMO2 | FYN | GLIPR1 | GSS |
| Effector memeory CD4 T cell | ATM | CASP3 | CASQ1 | CD300E | DARS | DOCK9 | EXOSC9 |
|  | EZH2 | GDE1 | IL34 | NCOA4 | NEFL | PDGFRL | PTGS1 |
| T follicular helper cell | B3GAT1 | CDK5R1 | PDCD1 | BCL6 | CD200 | CD83 | CD84 |
|  | FGF2 | GPR18 | CEBPA | CECR1 | CLEC10A | CLEC4A | CSF1R |
| Gamma delta T cell | ACP5 | AQP9 | BTN3A2 | C1orf54 | CARD8 | CCL18 | CD209 |
|  | CD33 | CD36 | CDK5 | IL10RB | KLRF1 | LGALS1 | MAPK7 |
| Type 1 T helper cell | CD70 | TBX21 | ADAM8 | AHCYL2 | ALCAM | B3GALNT1 | BBS12 |
|  | BST1 | CD151 | CD47 | CD48 | CD52 | CD53 | CD59 |
| Type 17 T helper cell | IL17A | IL17RA | C2CD4A | C2CD4B | CA2 | CCDC65 | CEACAM3 |
|  | IL17C | IL17F | IL17RC | IL17RE | IL23A | ILDR1 | LONRF3 |
| Type 2 T helper cell | ASB2 | CSRP2 | DAPK1 | DLC1 | DNAJC12 | DUSP6 | GNAI1 |
|  | LAMP3 | NRP2 | OSBPL1A | PDE4B | PHLDA1 | PLA2G4A | RAB27B |
| Regulatory T cell | CCL3L1 | CD72 | CLEC5A | FOXP3 | ITGA4 | L1CAM | LIPA |
|  | LRP1 | LRRC42 | MARCO | MMP12 | MNDA | MRC1 | MS4A6A |
| Activated B cell | ADAM28 | CD180 | CD79B | BLK | CD19 | MS4A1 | TNFRSF17 |
|  | IGHM | GNG7 | MICAL3 | SPIB | HLA-DOB | IGKC | PNOC |
| Immature B cell | CD22 | CYBB | FAM129C | FCRL1 | FCRL3 | FCRL5 | FCRLA |
|  | HDAC9 | HLA-DQA1 | HVCN1 | KIAA0226 | NCF1 | NCF1B | P2RY10 |
| Memory B cell | AICDA | CCNA2 | CDKN3 | CLCN5 | ENPP1 | FCER1A | FCRL4 |
|  | MYC | RUNX2 | SORL1 | SOX5 | STAT5A | STAT5B | TLR9 |
| Natural killer cell | AKT3 | AXL | BST2 | CDH2 | CRTAM | CSF2RA | CTSZ |
|  | CXCL1 | CYTH1 | DAXX | DGKH | DLL4 | DPYD | ERBB3 |
| CD56bright natural killer cell | ABAT | C11orf75 | C5orf15 | CDHR1 | DCAF12 | DYNLL1 | GPR137B |
|  | HCP5 | HDGFRP2 | KRT86 | MLST8 | ELMOD3 | ENTPD5 | FAM119A |
| CD56dim natural killer cell | CYP27A1 | DDX55 | DYRK2 | RPL37A | NOTCH3 | AKR7A3 | GPRC5C |
|  | GRIN1 | HLA-E | PORCN | PSMC4 | UPP1 | IL21R | KIR2DS1 |
| Myeloid derived suppressor cell | CCR2 | CD14 | CD2 | CD86 | CXCR4 | FCGR2A | FCGR2B |
|  | FCGR3A | FERMT3 | GPSM3 | IL18BP | IL4R | ITGAL | ITGAM |
| Natural killer T cell | BTN2A2 | CD101 | CD109 | CNPY3 | CNPY4 | CREB1 | CRTC2 |
|  | CRTC3 | CSF2 | KLRC1 | FUT4 | ICAM2 | IL32 | LAMP2 |
| Activated dendritic cell | ABCD1 | C1QC | CAPG | CCL3L3 | CD207 | CD302 | ATP5B |
|  | ATP5L | ATP6V1A | BCL2L1 | C1QB | SNURF | SPCS3 | CCNA1 |
| Plasmacytoid dendritic cell | CBX6 | DAB2 | DDX17 | HIGD1A | IDH3A | IL3RA | MAGED1 |
|  | NUCB2 | OFD1 | OGT | PDIA4 | SERTAD2 | SIRPA | TMED2 |
| Immature dendritic cell | ACADM | AHCYL1 | ALDH1A2 | ALDH3A2 | ALDH9A1 | ALOX15 | AMT |
|  | ARL1 | ATIC | ATP5A1 | CAPZA1 | LILRA5 | RDX | RRAGD |
| Macrophage | AIF1 | CCL1 | CCL14 | CCL23 | CCL26 | CD300LB | CNR1 |
|  | CNR2 | EIF1 | EIF4A1 | FPR1 | FPR2 | FRAT2 | GPR27 |
| Eosinophil | GIPR | KRT18P50 | LRMP | FOSB | RRP12 | GPR183 | NR4A3 |
|  | ST3GAL6 | DEPDC5 | PDE6C | PKD2L2 | GPR65 | IL5RA | P2RY14 |
| Mast cell | ADAMTS3 | CPA3 | CMA1 | CTSG | ARHGAP15 | CPM | FCN1 |
|  | FTL | HSPA6 | ITGA9 | RNASE3 | S100A4 | SIGLEC8 | SLC6A4 |
| Monocyte | ASGR2 | CFP | ASGR1 | CD1D | UPK3A | ACTG1 | ANXA5 |
|  | ATP6V1B2 | CFL1 | DAZAP2 | CTBS | EMR4P | HIVEP2 | MARCKSL1 |
| Neutrophil | CREB5 | CDA | CHST15 | S100A12 | APOBEC3A | CASP5 | MMP25 |
|  | HAL | C1orf183 | FFAR2 | MAK | CXCR1 | STEAP4 | MGAM |

**Additional file 2: Figure S1.** The difference in immune score between the high- and low-ARHGAP20 groups.


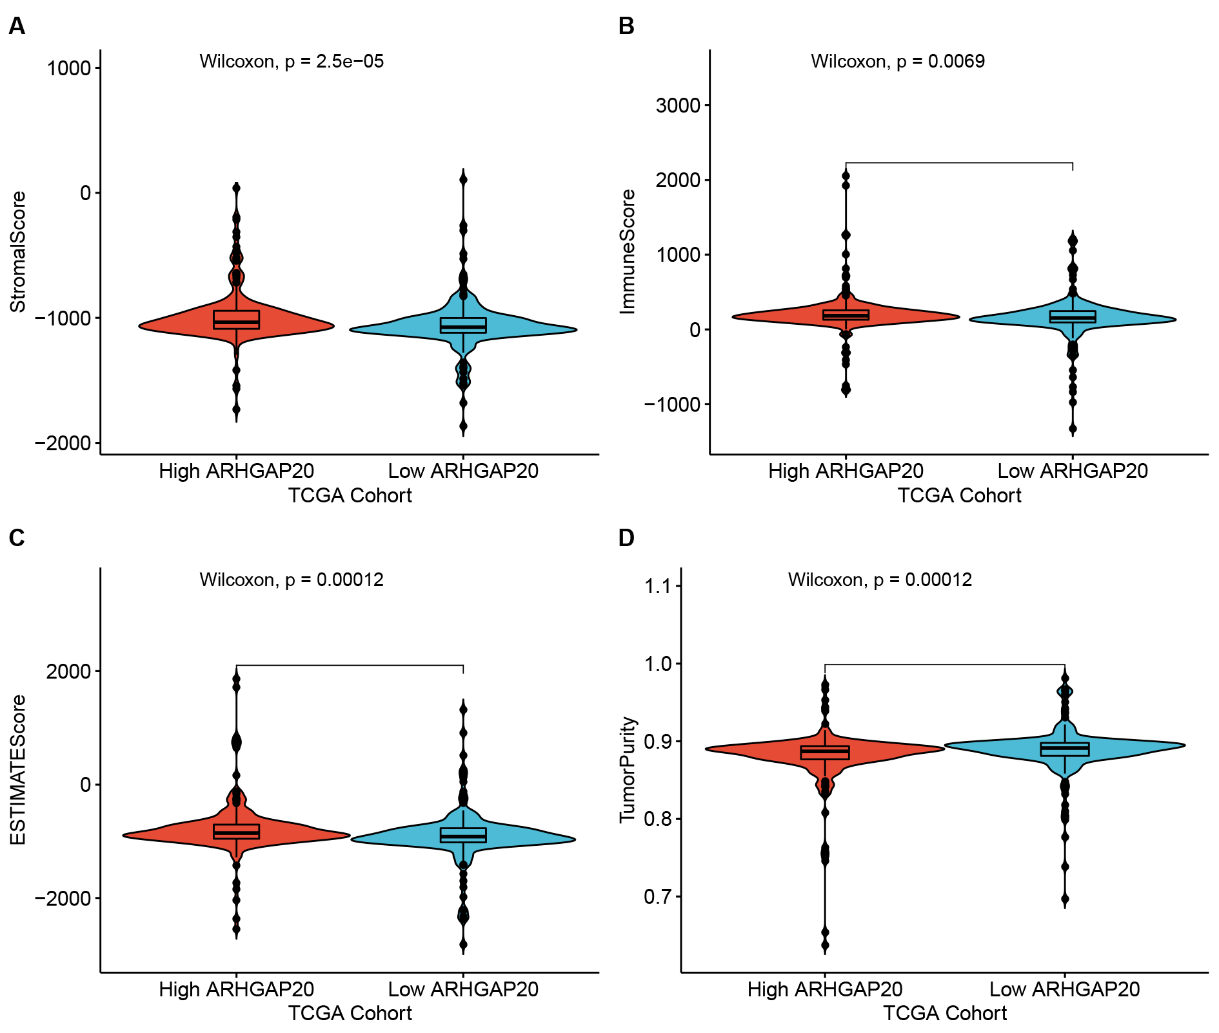


**Figure S1** Difference in immune score between the high- and low-ARHGAP20 group.

The difference of stromal score (A), immune score (B), estimate score (C), and tumor purity between high- and low-ARHGAP20 group in the Cancer Genome Atlas-liver hepatocellular carcinoma dataset.

**Additional file 3: Figure S2.** Heatmap showing the difference of immune markers between the high- and low-ARHGAP20 groups.


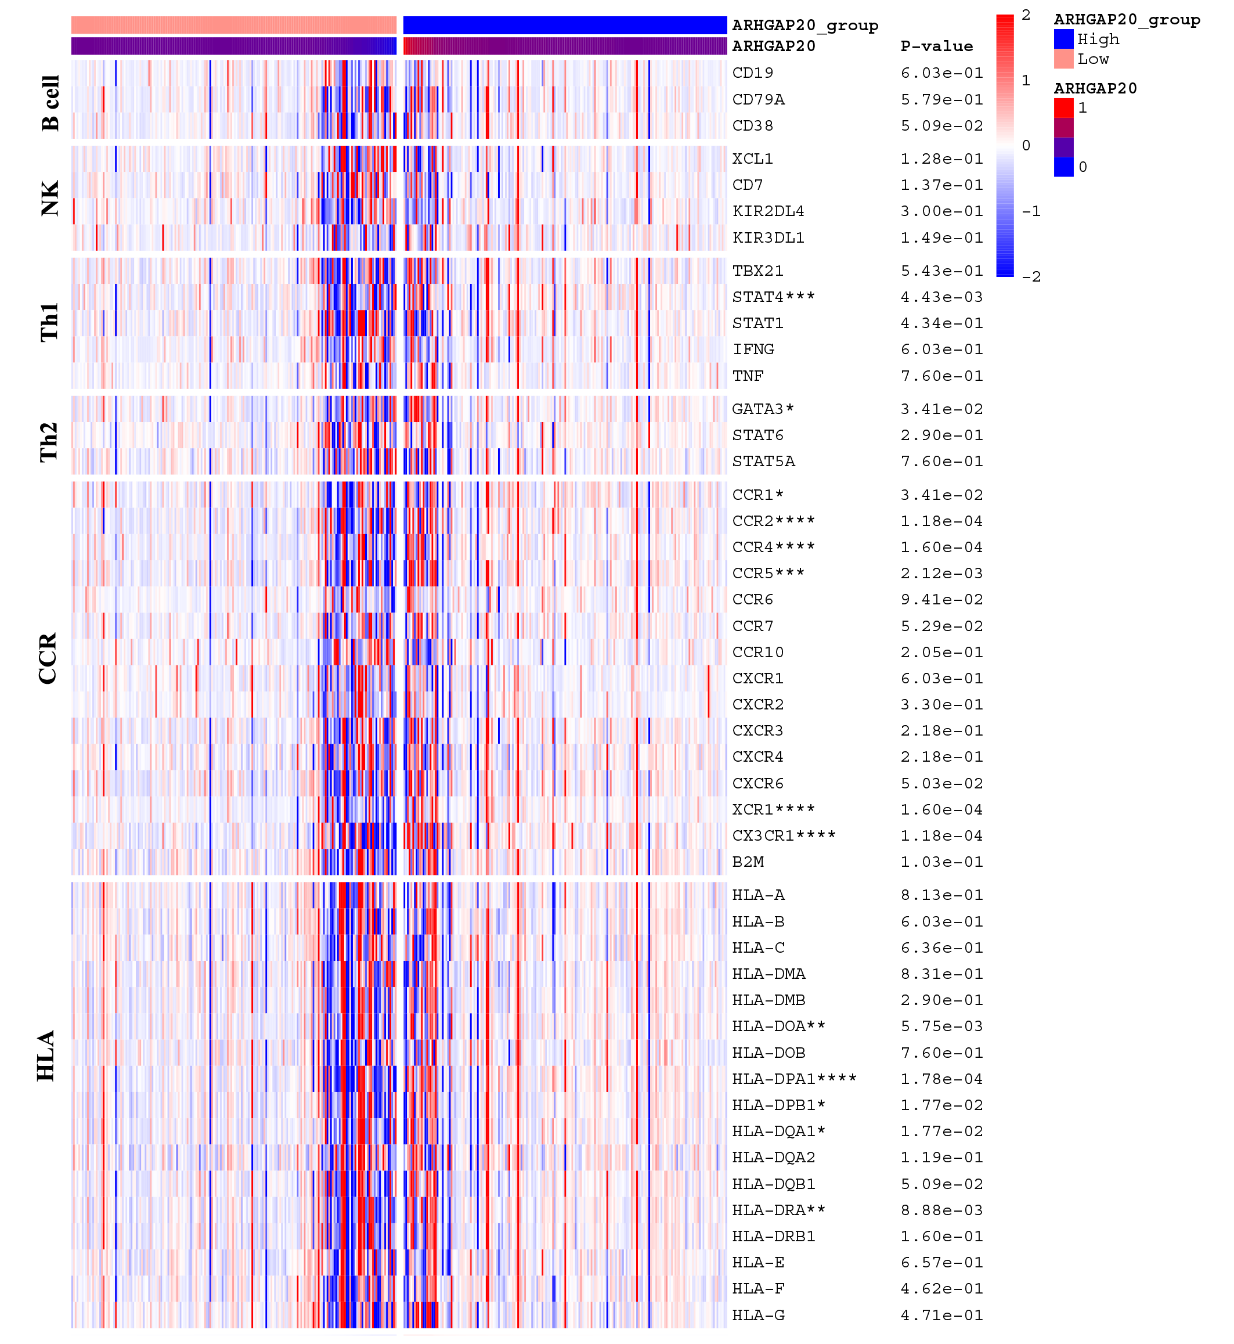


**Figure S2** Heatmap showing the difference of immune markers between the high- and low-ARHGAP20 groups. P-value: ****<0.0001<***<0.001<**<0.01<*<0.05.
